# Supplementary material for: Chiral bis(benzo[1,2-b:4,3-b′]dithiophene) atropisomers: experimental and theoretical investigations of the stereochemical and chiroptical properties
Source: Royal Society of Chemistry journal article supplement (doi:10.1039/d1nj03248h), 2021-01-01
Supplement: d1nj03248h1.pdf [file d1nj03248h1.pdf]

## SUPPLEMENTARY MATERIAL (SI)

for

### Chiral bis(benzo[1,2-*b*:4,3-*b'*]dithiophene) atropisomers: experimental and theoretical investigations of the stereochemical and chiroptical properties

Valentina Pelliccioli,<sup>a</sup> Roberta Franzini,<sup>b</sup> Giuseppe Mazzeo,<sup>c</sup> Claudio Villani,<sup>b,\*</sup> Sergio Abbate,<sup>c,d</sup>

Giovanna Longhi,<sup>c,d,\*</sup> Emanuela Licandro,<sup>a</sup> Silvia Cauteruccio<sup>a,\*</sup>

<sup>a</sup>*Dipartimento di Chimica, Università degli Studi di Milano, via Golgi 19, I-20133 Milan, Italy*

<sup>b</sup>*Dipartimento di Chimica e Tecnologie del Farmaco, Sapienza Università di Roma, P.le A. Moro 5, 00185 Roma, Italy*

<sup>c</sup>*Dipartimento di Medicina Molecolare e Traslazionale, Università di Brescia, Viale Europa 11, 25123 Brescia, Italy*

<sup>d</sup>*Istituto Nazionale di Ottica (INO), CNR, Research Unit of Brescia, c/o CSMT, via Branze 45, 25123 Brescia, Italy*

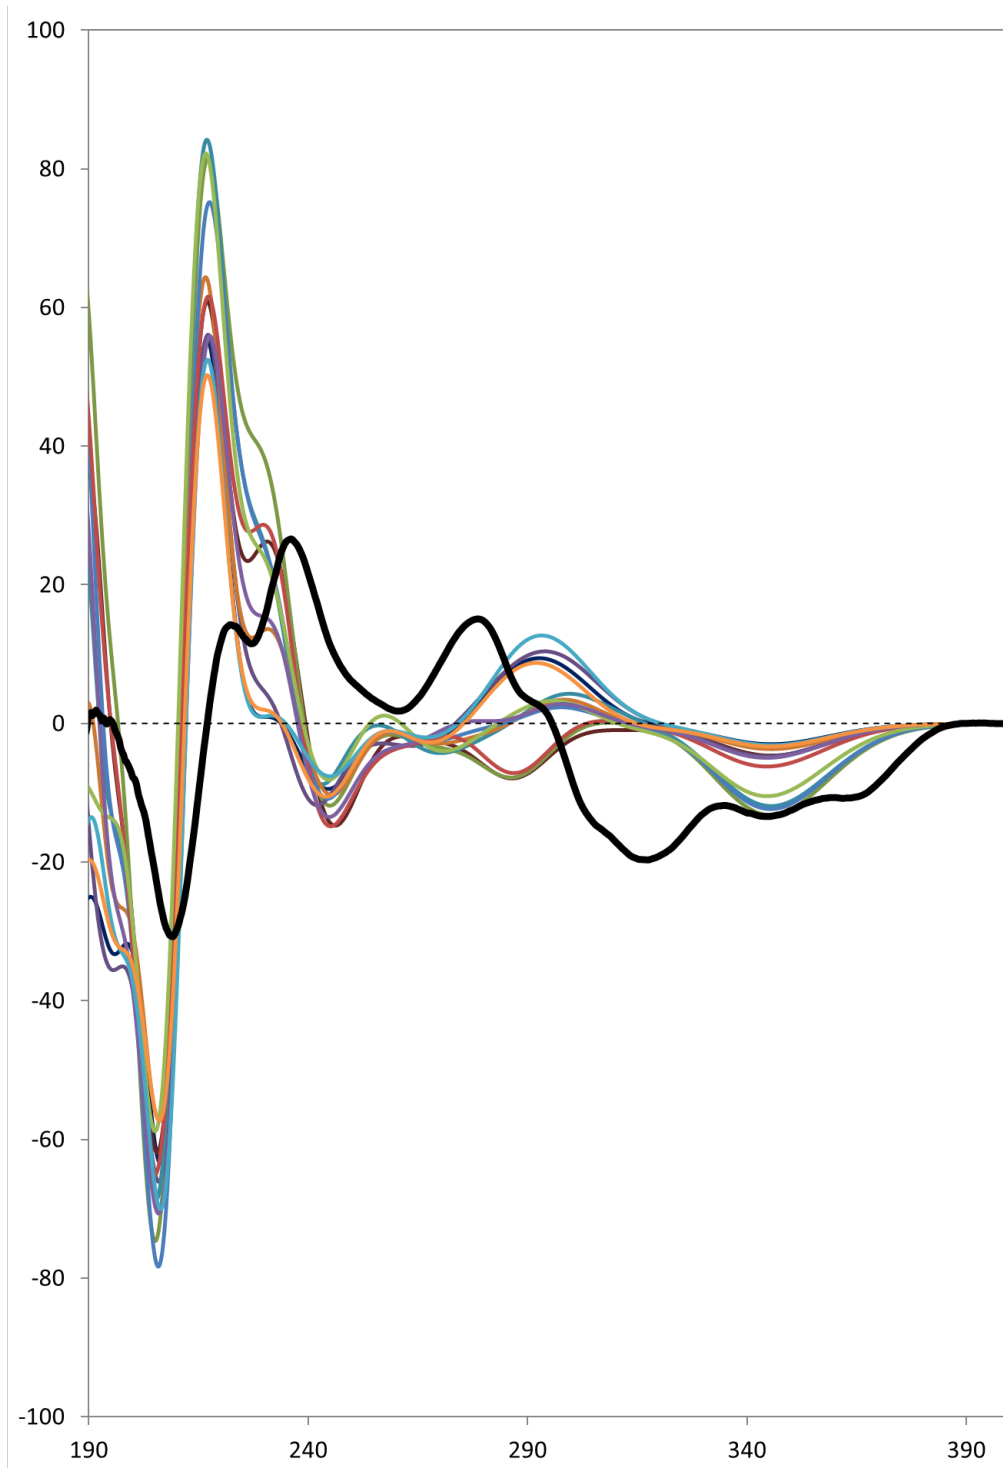

Figure 1-SI. ECD spectra of calculated conformers of compound **3** compared with experimental spectrum. Calculations are performed at CAM-B3LYP/TZVP level of theory.

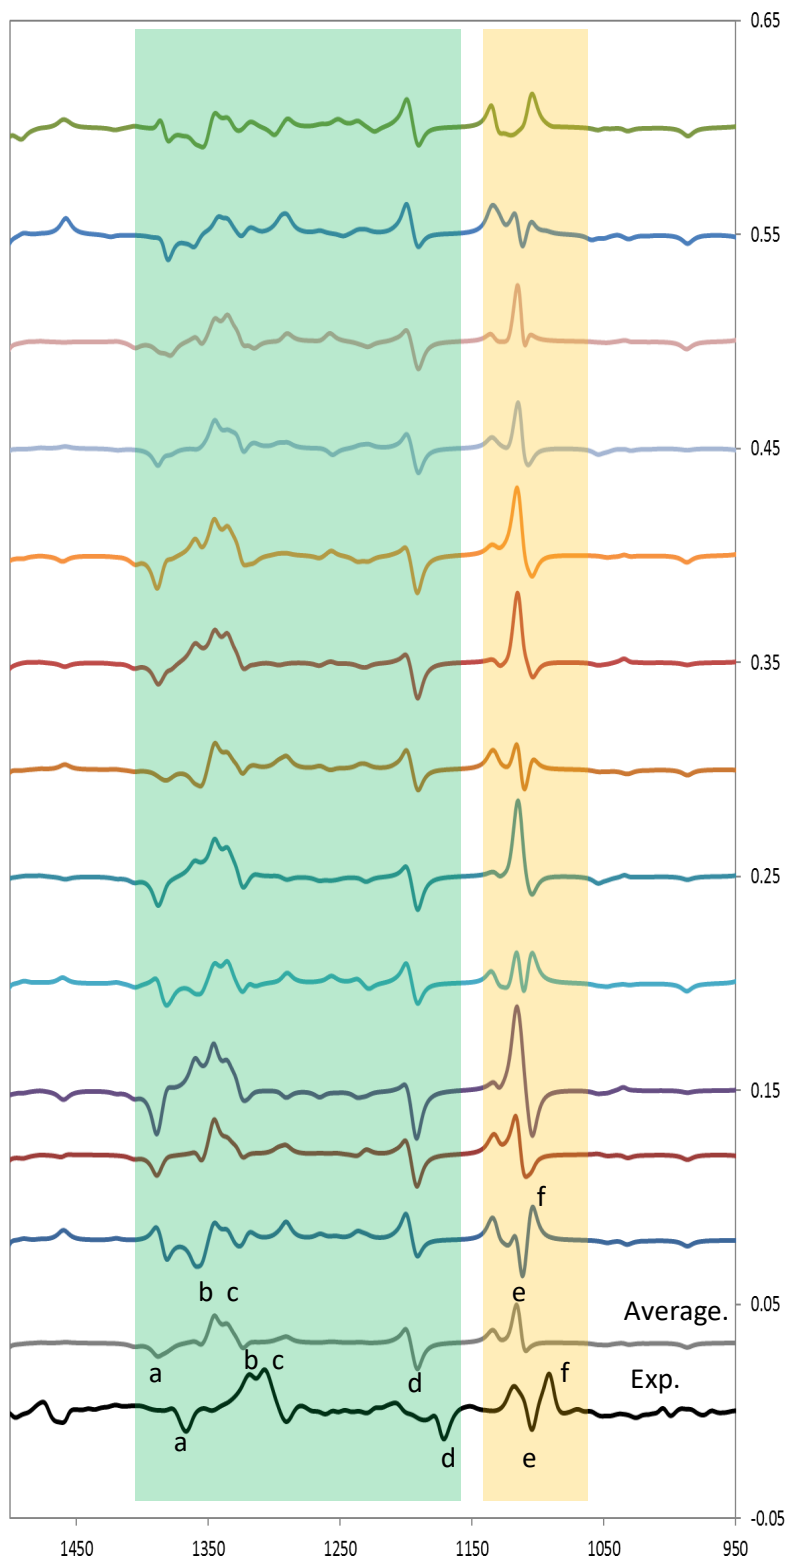

Figure 2-SI. VCD spectra of calculated conformers of compound **3** compared with Boltzmann average and with experimental spectrum. Evidenced in green the region bearing features (a-d) present in all conformers, evidenced in yellow features highly dependent on propyl groups' conformations (e,f).

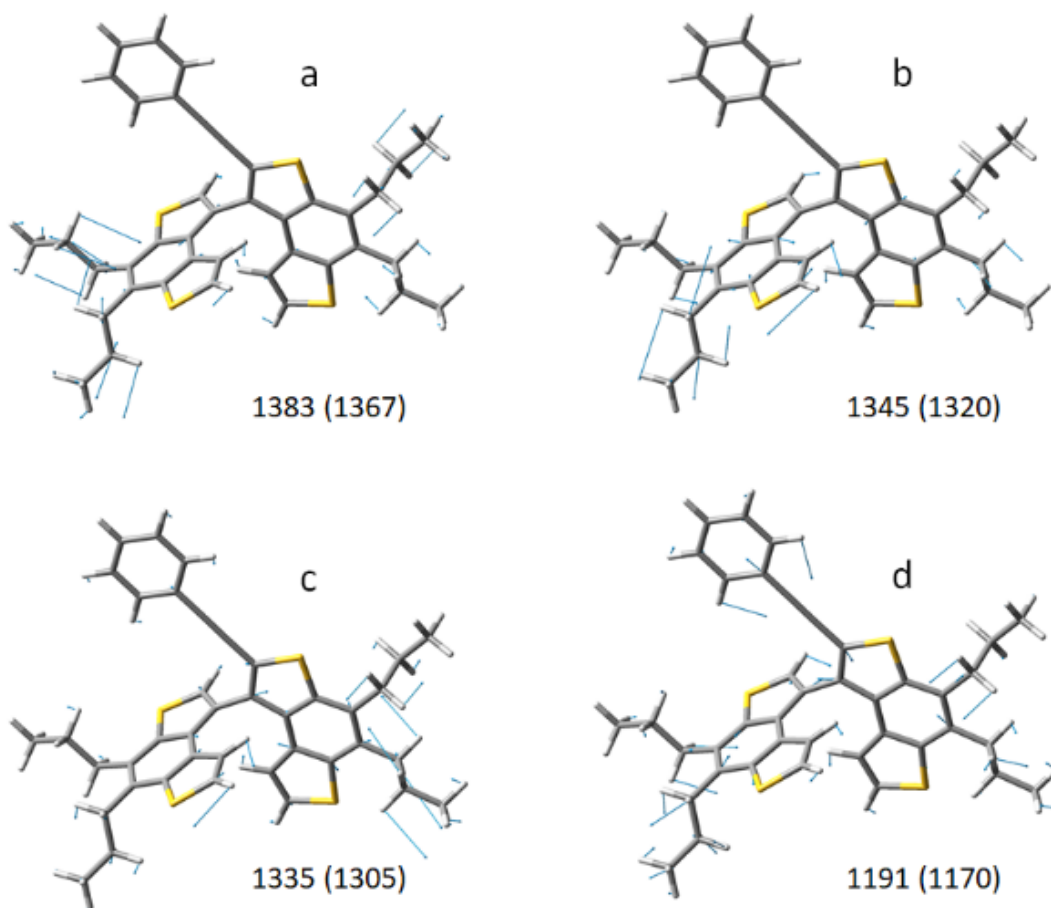

Figure 3a-SI. Examples of modes responsible of bands not much influenced by propyl conformations. Calculated and experimental (in brackets) wavenumbers are reported.

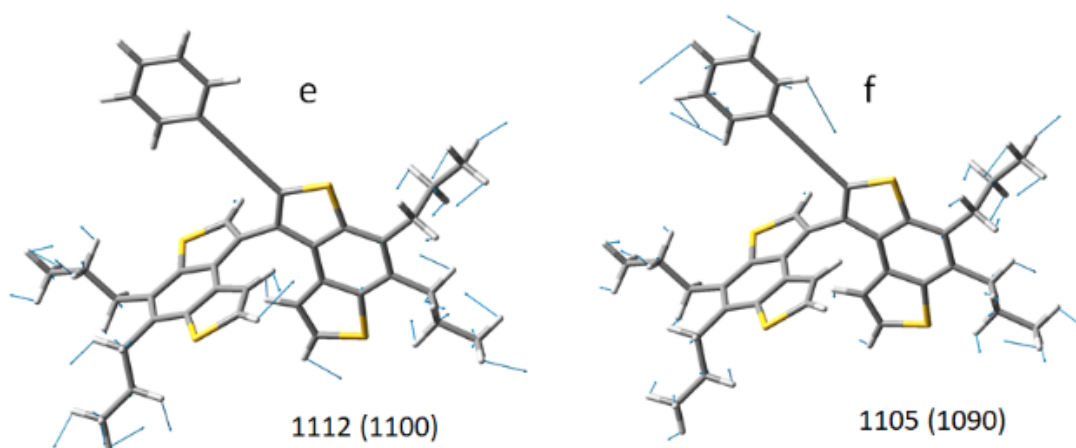

Figure 3b-SI. Examples of modes responsible of bands not much influenced by propyl conformations. Calculated and experimental (in brackets) wavenumbers are reported.

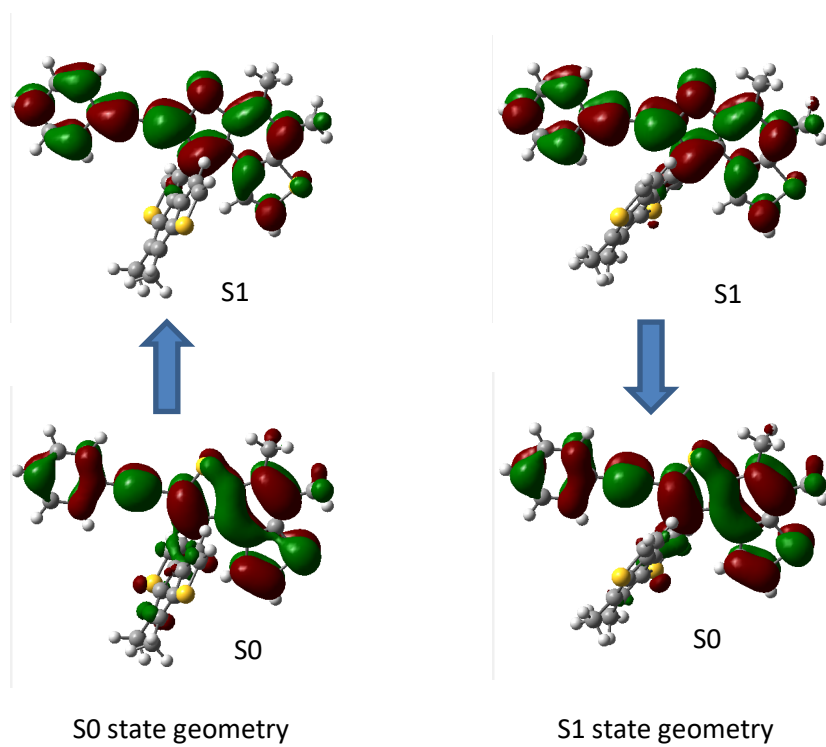

Figure 4-SI. Kohn-Sham HOMO-LUMO orbitals of methyl model for compound **3** for the ground (left) and first excited state structure (right).

| T (°C) | T (K)  | 1/T (K <sup>-1</sup> ) | k <sub>1,2</sub> (min <sup>-1</sup> ) | k <sub>2,1</sub> (min <sup>-1</sup> ) | k <sub>av</sub> (min <sup>-1</sup> ) | k <sub>av</sub> (s <sup>-1</sup> ) | ln k (s <sup>-1</sup> )/T (K) |
|--------|--------|------------------------|---------------------------------------|---------------------------------------|--------------------------------------|------------------------------------|-------------------------------|
| 40     | 313.15 | 0.003194               | 0.0234                                | 0.0216                                | 0.0225                               | 0.000375                           | -13.6352                      |
| 50     | 323.15 | 0.003094               | 0.0565                                | 0.052                                 | 0.0542                               | 0.000904                           | -12.78661                     |
| 55     | 328.15 | 0.003047               | 0.0953                                | 0.0885                                | 0.0919                               | 0.001532                           | -12.27486                     |

Table 1-SI. Kinetic rate constants (k) of the on-column enantiomerization of **4**.

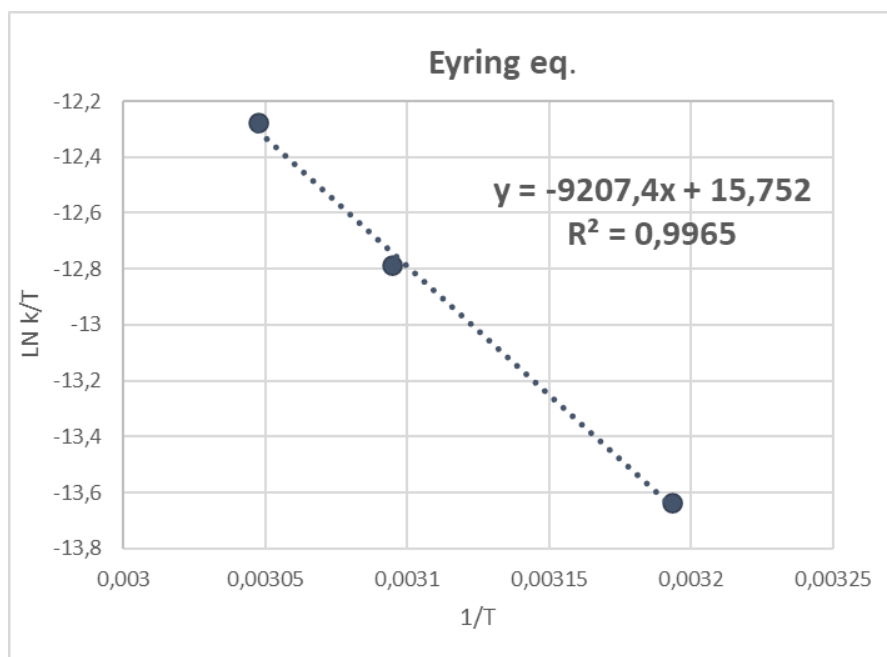

Figure 5-SI. Eyring plot enantiomerization of compound **4**.

|                              |                               |                                    |
|------------------------------|-------------------------------|------------------------------------|
| $\Delta H^\ddagger$ (kJ/mol) | $\Delta S^\ddagger$ (J/mol*K) | $\Delta G^\ddagger$ (kJ/mol) 25 °C |
| 76.60                        | - 66.94                       | 96.56                              |
| $\Delta H^\ddagger$ (kJ/mol) | $\Delta S^\ddagger$ (J/mol*K) | $\Delta G^\ddagger$ (kJ/mol) 25 °C |
| 18.30                        | - 15.99                       | 23.06                              |

Table 2-SI. Energetic barrier of the on-column enantiomerization ( $\Delta G^\ddagger$ ) of **4**.

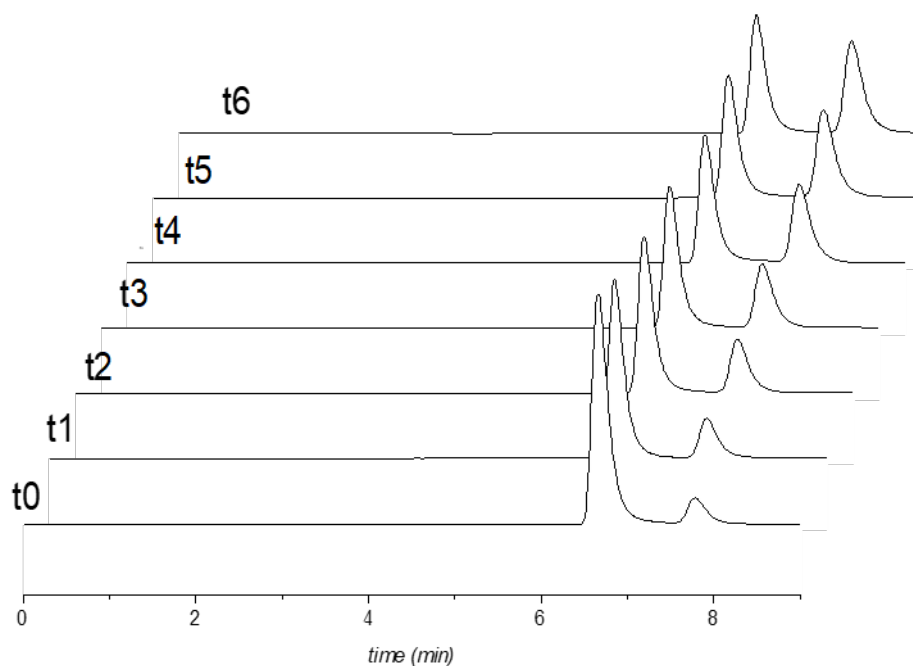

Figure 6-SI. Thermal racemization of compound **4** in Hexane at 35.5 °C starting from a solution enriched in the 1<sup>st</sup> eluted enantiomer, monitored over time by CSP-HPLC ( $t_0=0$  min,  $t_1=10$  min,  $t_2=20$  min,  $t_3=30$  min,  $t_4=50$  min,  $t_5=70$  min,  $t_6=90$  min). Column: Chiralpak IB 250 mm (L)  $\times$  4.6 mm (I.D.). Eluent: hexane/isopropyl alcohol 100/0.025 (v/v), flow rate: 1 ml/min, detector: UV @300 nm.

Table 3-SI. Energetic Characteristics of the lowest energy transition: wavelength (nm), dipole (D) and rotational strengths (R), orbital involved in the transition. D and R given as  $10^{-40}$  esu<sup>2</sup>cm<sup>2</sup>.

| Compound 1 (methyl) |           |        |       | Compound 1 (propyl) |           |        |       |               |
|---------------------|-----------|--------|-------|---------------------|-----------|--------|-------|---------------|
| #                   | $\lambda$ | D      | R     | MOs                 | $\lambda$ | D      | R     | MOs           |
| 1                   | 281       | 235790 | 3.08  | HO-1→LU;HO→LU       | 281       | 234520 | -7.34 | HO-1→LU;HO→LU |
| 2                   | 277       | 151298 | -20.1 | HO→LU+1             | 277       | 123269 | -68.3 | HO→LU+1       |
| 3                   | 275       | 47435  | 50.25 | HO-3→LU             | 275       | 68474  | 78.42 | HO-3→LU       |
| 4                   | 273       | 25282  | -2.75 | HO-2→LU+1           | 274       | 38536  | -13.4 | HO-2→LU+1     |
| Compound 2 (methyl) |           |        |       | Compound 2 (propyl) |           |        |       |               |
| #                   | $\lambda$ | D      | R     | MOs                 | $\lambda$ | D      | R     | MOs           |
| 1                   | 293       | 310060 | -106  | HO→LU+1;HO→LU       | 296       | 388335 | -80.8 | HO→LU+1;HO→LU |
| 2                   | 290       | 189754 | 74.48 | HO-1→LU;HO-1→LU+1   | 282       | 37200  | -5.84 | HO-2→LU       |
| 3                   | 273       | 17580  | -1.97 | HO-2→LU;HO-2→LU+1   | 278       | 138651 | 47.36 | HO-1→LU+1     |
| 4                   | 271       | 14419  | -6.67 | HO-3→LU;HO-3→LU+1   | 274       | 45878  | -4.14 | HO-3→LU+1     |
| Compound 3 (methyl) |           |        |       | Compound 3 (propyl) |           |        |       |               |
| #                   | $\lambda$ | D      | R     | MOs                 | $\lambda$ | D      | R     | MOs           |
| 1                   | 330       | 761396 | -34.2 | HO→LU               | 336       | 775737 | -13.2 | HO→LU         |
| 2                   | 298       | 44462  | -12.6 | HO-1→LU             | 296       | 52745  | -16.3 | HO-2→LU       |
| 3                   | 290       | 7955   | 27.05 | HO-1→LU+1           | 291       | 6874   | 31.77 | HO-1→LU       |
| 4                   | 283       | 172286 | 17.27 | HO-2→LU             | 277       | 165584 | 30.67 | HO-1→LU+1     |
| 5                   | 273       | 23083  | -2.27 | HO-3→LU+1;HO→LU+1   | 274       | 25743  | -8.75 | HO-3→LU+1     |



## XYZ Cartesian coordinates of optimized structures

### Calculated P methyl (1) DFT/B3LYP/TZVP

|    |             |             |             |
|----|-------------|-------------|-------------|
| C  | 4.14265400  | 0.09705800  | 0.52597300  |
| C  | 1.93433000  | -1.29223200 | -0.64041600 |
| C  | 4.27932900  | -1.25042000 | 0.19612900  |
| C  | 2.91292500  | 0.72445300  | 0.25314800  |
| C  | 1.80165100  | 0.08269000  | -0.32230200 |
| C  | 3.17221700  | -1.90955000 | -0.36954400 |
| S  | 3.13578700  | -3.61227800 | -0.83293500 |
| C  | 1.48244100  | -3.45468500 | -1.37629800 |
| H  | 0.97666500  | -4.31711000 | -1.78079100 |
| C  | 0.98732700  | -2.20558900 | -1.21801800 |
| H  | -0.01760000 | -1.93354800 | -1.49824500 |
| S  | 2.56943000  | 2.42828700  | 0.56973600  |
| C  | 0.95368200  | 2.22723400  | -0.07120400 |
| C  | 0.66616600  | 0.96772100  | -0.49947700 |
| Br | -0.20430200 | 3.72204900  | -0.08693300 |
| C  | 5.27848500  | 0.87729500  | 1.13888500  |
| H  | 5.83898600  | 0.27743400  | 1.85605800  |
| H  | 4.91727200  | 1.75999200  | 1.66799700  |
| C  | 5.56742400  | -1.99247600 | 0.45015500  |
| H  | 5.62313300  | -2.90719400 | -0.13982200 |
| H  | 5.66269900  | -2.27718700 | 1.50284600  |
| C  | -0.63905100 | 0.58611300  | -1.08417600 |
| C  | -0.91384200 | 0.77078200  | -2.40174100 |
| H  | -0.25609400 | 1.19259400  | -3.14527700 |
| S  | -2.50884000 | 0.24696500  | -2.86507600 |
| C  | -2.85183900 | -0.25443400 | -1.20751800 |
| C  | -3.10002100 | -0.90247200 | 1.42473600  |
| C  | -4.06708900 | -0.81913600 | -0.77357000 |
| C  | -1.75062600 | -0.00274600 | -0.36863300 |
| C  | -1.87810000 | -0.34541200 | 1.00028500  |
| C  | -4.19814200 | -1.14023700 | 0.57601400  |
| S  | -3.05694000 | -1.25731200 | 3.15331400  |
| C  | -1.42143600 | -0.65125900 | 3.26297200  |
| H  | -0.91834100 | -0.66280900 | 4.21687200  |
| C  | -0.93729900 | -0.21342000 | 2.07771100  |
| H  | 0.05578400  | 0.19173300  | 1.96383600  |
| C  | -5.47119500 | -1.73995900 | 1.11861200  |
| H  | -5.53228700 | -1.63266300 | 2.20153400  |
| H  | -6.35457700 | -1.26187700 | 0.69377300  |
| C  | -5.19577600 | -1.04459000 | -1.74818100 |
| H  | -5.72131800 | -1.97858100 | -1.54762500 |
| H  | -5.93298700 | -0.23664700 | -1.69938600 |
| H  | -5.53677300 | -2.80911000 | 0.89276600  |
| H  | -4.83276300 | -1.09017200 | -2.77534300 |
| H  | 6.43804400  | -1.38717400 | 0.19533900  |
| H  | 5.98443600  | 1.22161200  | 0.37623200  |

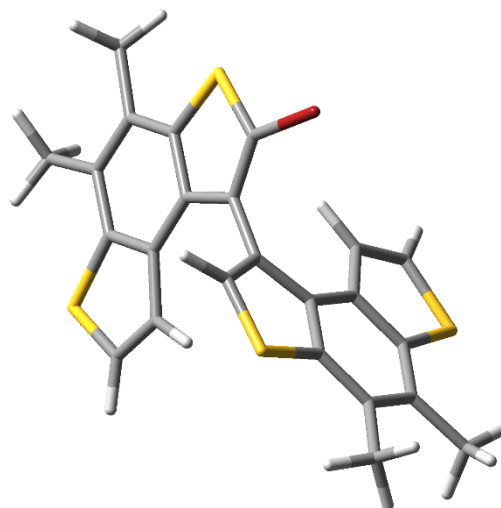

Calculated P propyl (*trans*) (1) DFT/B3LYP/TZVP

|    |             |             |             |
|----|-------------|-------------|-------------|
| C  | 4.07943900  | -0.15564900 | 0.51281800  |
| C  | 1.64653400  | -1.27163800 | -0.50947200 |
| C  | 3.99227900  | -1.53463100 | 0.30608900  |
| C  | 2.94612300  | 0.62812800  | 0.20618000  |
| C  | 1.73536800  | 0.12788500  | -0.30107400 |
| C  | 2.77764800  | -2.04895600 | -0.19635800 |
| S  | 2.45916400  | -3.75893700 | -0.50178600 |
| C  | 0.83756700  | -3.38989800 | -1.03631100 |
| H  | 0.19182800  | -4.19305200 | -1.35440600 |
| C  | 0.55152000  | -2.06848600 | -0.98942700 |
| H  | -0.40513900 | -1.66463900 | -1.27929400 |
| S  | 2.86486600  | 2.38138500  | 0.41813300  |
| C  | 1.22251400  | 2.38636100  | -0.18312400 |
| C  | 0.73928300  | 1.15940300  | -0.51958900 |
| Br | 0.30017300  | 4.03430100  | -0.28011500 |
| C  | 5.32104700  | 0.53307500  | 1.03574000  |
| H  | 5.90029600  | -0.14929100 | 1.65933100  |
| H  | 5.01849100  | 1.35030200  | 1.69948000  |
| C  | 6.24183800  | 1.10749100  | -0.05837100 |
| H  | 6.58395600  | 0.29478400  | -0.70390900 |
| H  | 5.66843100  | 1.78361400  | -0.69785800 |
| C  | 7.44652000  | 1.84692400  | 0.52291600  |
| H  | 8.05629200  | 1.18624700  | 1.14518600  |
| H  | 7.13186200  | 2.68912200  | 1.14472800  |
| H  | 8.08726100  | 2.24094100  | -0.26858400 |
| C  | 5.13176200  | -2.49066400 | 0.58186500  |
| H  | 4.71972000  | -3.41861200 | 0.99179100  |
| H  | 5.78583300  | -2.09109200 | 1.35817800  |
| C  | 5.98411300  | -2.83868300 | -0.65398000 |
| H  | 5.33620500  | -3.23022400 | -1.44224900 |
| H  | 6.43139900  | -1.92460000 | -1.05254900 |
| C  | 7.08154100  | -3.85424000 | -0.33735700 |
| H  | 6.65807400  | -4.79309300 | 0.02892800  |
| H  | 7.76306900  | -3.47733800 | 0.43015300  |
| H  | 7.67572100  | -4.08267900 | -1.22456700 |
| C  | -0.62370500 | 0.94066100  | -1.05389000 |
| C  | -0.90451300 | 1.07869000  | -2.37576300 |
| H  | -0.21217500 | 1.34531800  | -3.15871000 |
| S  | -2.57176100 | 0.77213100  | -2.77174900 |
| C  | -2.94153600 | 0.44001600  | -1.07665300 |
| C  | -3.21320500 | 0.03431800  | 1.59472000  |
| C  | -4.22395900 | 0.10443600  | -0.58713300 |
| C  | -1.79089000 | 0.57402100  | -0.28091800 |
| C  | -1.93332500 | 0.36368900  | 1.11325700  |
| C  | -4.36344600 | -0.10419500 | 0.78667400  |
| S  | -3.18424000 | -0.15837900 | 3.35001500  |

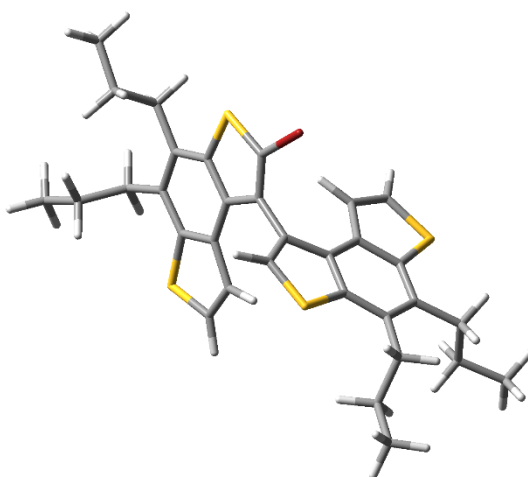

|   |             |             |             |
|---|-------------|-------------|-------------|
| C | -1.47523800 | 0.20170300  | 3.38979400  |
| H | -0.95869000 | 0.20359900  | 4.33655600  |
| C | -0.95834800 | 0.45077900  | 2.16446400  |
| H | 0.08043300  | 0.69268300  | 2.00427300  |
| C | -5.67414400 | -0.47819000 | 1.44309900  |
| H | -5.74005600 | 0.03064700  | 2.41038300  |
| H | -6.51505300 | -0.10496600 | 0.85682900  |
| C | -5.86212600 | -1.99031800 | 1.67289300  |
| H | -5.01839400 | -2.37642000 | 2.25046600  |
| H | -5.83518300 | -2.50732000 | 0.71026900  |
| C | -7.17053300 | -2.31198200 | 2.39440800  |
| H | -7.20736100 | -1.83581100 | 3.37769200  |
| H | -7.28560600 | -3.38772400 | 2.54277600  |
| H | -8.03559600 | -1.96134200 | 1.82486600  |
| C | -5.36880700 | -0.01686800 | -1.56895000 |
| H | -6.31795100 | 0.19539000  | -1.07489500 |
| H | -5.25779200 | 0.75630100  | -2.33652800 |
| C | -5.46962600 | -1.38699800 | -2.26685800 |
| H | -5.61557400 | -2.16511500 | -1.51336000 |
| H | -4.52063000 | -1.61361700 | -2.75980400 |
| C | -6.60507300 | -1.43889700 | -3.28869800 |
| H | -7.57261600 | -1.24422900 | -2.81804600 |
| H | -6.66107800 | -2.41856700 | -3.76784300 |
| H | -6.46424900 | -0.69268400 | -4.07502900 |

Calculated P methyl (2) DFT/B3LYP/TZVP

|   |             |             |             |
|---|-------------|-------------|-------------|
| C | 4.21684100  | 0.23554300  | 0.48571500  |
| C | 2.08205500  | -1.26720800 | -0.67553400 |
| C | 4.42895100  | -1.09766800 | 0.14087800  |
| C | 2.93932400  | 0.78420400  | 0.26322500  |
| C | 1.85593900  | 0.08141800  | -0.29468500 |
| C | 3.36154000  | -1.80864500 | -0.43870900 |
| S | 3.44426300  | -3.48574500 | -0.98280000 |
| C | 1.77864700  | -3.42323400 | -1.50675200 |
| H | 1.33231000  | -4.29894900 | -1.95067900 |
| C | 1.19837100  | -2.22049600 | -1.28884600 |
| H | 0.17485900  | -2.01010700 | -1.55325600 |
| S | 2.48193100  | 2.43987200  | 0.64271900  |
| C | 0.84629900  | 2.17836700  | 0.03605200  |
| C | 0.66385200  | 0.89511900  | -0.41018900 |
| C | 5.31310500  | 1.07356100  | 1.09514300  |
| H | 5.41551000  | 0.88007000  | 2.16788600  |
| C | 5.76572500  | -1.76209100 | 0.35480500  |
| H | 6.22230700  | -1.45602900 | 1.29646500  |
| H | 6.46850500  | -1.51251500 | -0.44678500 |
| C | -0.60702700 | 0.42795900  | -1.01682100 |
| C | -0.93470900 | 0.72234500  | -2.30182800 |
| H | -0.34922800 | 1.30004500  | -2.99950000 |
| S | -2.46745100 | 0.06525200  | -2.80807800 |
| C | -2.70989800 | -0.65545400 | -1.21532900 |
| C | -2.82719700 | -1.60212400 | 1.33497100  |
| C | -3.84043600 | -1.40482700 | -0.83491300 |
| C | -1.62526400 | -0.36994400 | -0.36537600 |
| C | -1.68674100 | -0.86421500 | 0.96158400  |
| C | -3.90534200 | -1.88078800 | 0.47333200  |
| S | -2.70965200 | -2.12308700 | 3.01748200  |
| C | -1.15552900 | -1.33972500 | 3.17853700  |
| H | -0.63618500 | -1.38914900 | 4.12247400  |
| C | -0.74792200 | -0.73034500 | 2.04114400  |
| H | 0.18982700  | -0.20333500 | 1.96033700  |
| C | -5.08652000 | -2.68401300 | 0.95745300  |
| H | -5.14074900 | -2.69665200 | 2.04602000  |
| H | -6.02897700 | -2.27728700 | 0.58895500  |
| C | -4.95468700 | -1.65996900 | -1.81891700 |
| H | -5.78807300 | -0.96619300 | -1.66801700 |
| H | -4.61414300 | -1.53841000 | -2.84743600 |
| H | 6.27971300  | 0.87074100  | 0.63315000  |
| H | 5.67099900  | -2.84792200 | 0.37655300  |
| H | 5.11339500  | 2.13880800  | 0.97622700  |
| H | -5.35129300 | -2.67136500 | -1.72508300 |
| H | -5.02573500 | -3.72441200 | 0.62234900  |
| C | -0.09818000 | 3.30724600  | 0.08034400  |

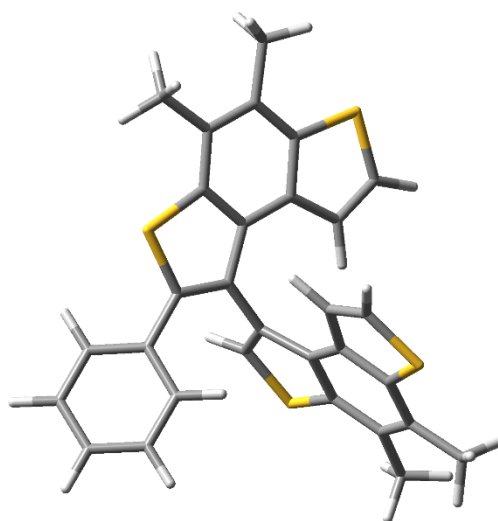

|   |             |            |             |
|---|-------------|------------|-------------|
| C | -1.87458000 | 5.48080600 | 0.18095800  |
| C | 0.31184200  | 4.59091100 | -0.30743400 |
| C | -1.41481400 | 3.13715800 | 0.52884300  |
| C | -2.29236300 | 4.21289600 | 0.57382500  |
| C | -0.56756300 | 5.66525100 | -0.25809000 |
| H | 1.32290600  | 4.74211500 | -0.66519500 |
| H | -1.74682000 | 2.16242000 | 0.85772500  |
| H | -3.30494900 | 4.06010100 | 0.92706200  |
| H | -0.23113200 | 6.64724400 | -0.56793400 |
| H | -2.56081300 | 6.31788000 | 0.21920200  |

### Calculated P propyl (trans) (2) DFT/B3LYP/TZVP

|   |             |             |             |
|---|-------------|-------------|-------------|
| C | 4.28466900  | 0.26969100  | -0.21762800 |
| C | 1.95084900  | -1.06623300 | -1.20455900 |
| C | 4.39649300  | -1.03705000 | -0.69726200 |
| C | 3.00850800  | 0.87442400  | -0.24202100 |
| C | 1.83376400  | 0.25680000  | -0.70316600 |
| C | 3.22626300  | -1.66149000 | -1.18074400 |
| S | 3.16784000  | -3.28810300 | -1.86638600 |
| C | 1.45447500  | -3.12987300 | -2.16540100 |
| H | 0.91957900  | -3.95005800 | -2.61747900 |
| C | 0.95699000  | -1.93397700 | -1.77455800 |
| H | -0.08148900 | -1.66874000 | -1.88800300 |
| S | 2.67905100  | 2.52181800  | 0.28298100  |
| C | 0.97124400  | 2.36565600  | -0.12744900 |
| C | 0.67554300  | 1.12191700  | -0.62187300 |
| C | 5.45418500  | 1.05997300  | 0.32755400  |
| C | 5.69704500  | -1.80931400 | -0.71511900 |
| H | 6.54587600  | -1.12672600 | -0.77573000 |
| C | -0.67949200 | 0.74558500  | -1.09495700 |
| C | -1.14393100 | 1.13431400  | -2.31076300 |
| H | -0.61966600 | 1.73149100  | -3.04002800 |
| S | -2.75275000 | 0.56749600  | -2.66433900 |
| C | -2.83991100 | -0.24091500 | -1.09664400 |
| C | -2.67677400 | -1.38351400 | 1.36208900  |
| C | -3.95263400 | -0.98090200 | -0.63685300 |
| C | -1.64886900 | -0.05334400 | -0.37407500 |
| C | -1.56695400 | -0.64566100 | 0.91126600  |
| C | -3.86818400 | -1.56989500 | 0.62680900  |
| S | -2.36479100 | -2.05377400 | 2.96611000  |
| C | -0.77450300 | -1.33055000 | 2.99041600  |
| H | -0.14206300 | -1.47672200 | 3.85172400  |
| C | -0.49343200 | -0.63221500 | 1.86606000  |
| H | 0.44573900  | -0.12602800 | 1.70727600  |
| C | -4.98622700 | -2.38081900 | 1.24441900  |
| H | -5.60188800 | -2.83602800 | 0.46725900  |

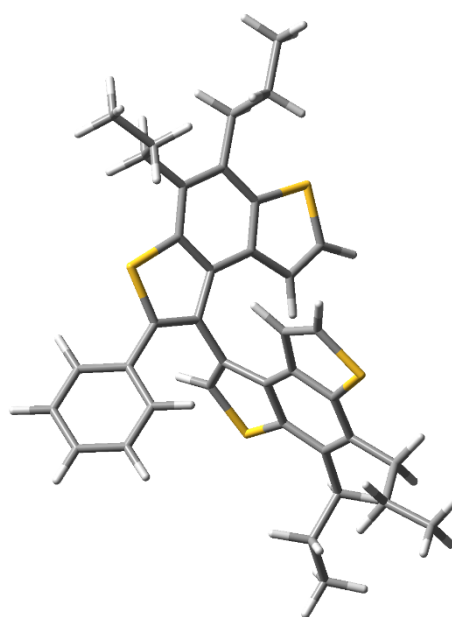

|   |             |             |             |
|---|-------------|-------------|-------------|
| C | -5.17306200 | -1.08675300 | -1.52508500 |
| H | -4.84435800 | -1.17410700 | -2.56604700 |
| H | 6.38732600  | 0.71999400  | -0.12395300 |
| H | 5.73618000  | -2.41111500 | -1.62908500 |
| H | 5.34442000  | 2.10624800  | 0.02313000  |
| H | -5.72027100 | -2.00622600 | -1.31221800 |
| H | -4.54768800 | -3.21598300 | 1.80049400  |
| C | 0.09396800  | 3.52638400  | 0.09899400  |
| C | -1.55235200 | 5.75829800  | 0.54494300  |
| C | 0.51625800  | 4.81534200  | -0.25676800 |
| C | -1.16727700 | 3.38023500  | 0.69195400  |
| C | -1.98107400 | 4.48502500  | 0.90753500  |
| C | -0.29881300 | 5.91857000  | -0.03645700 |
| H | 1.48400800  | 4.94906400  | -0.72440900 |
| H | -1.50469800 | 2.39995400  | 0.99809800  |
| H | -2.95117500 | 4.35003800  | 1.37028800  |
| H | 0.04531400  | 6.90453900  | -0.32444600 |
| H | -2.18849800 | 6.61794900  | 0.71637600  |
| C | -6.14515400 | 0.10421600  | -1.41889400 |
| H | -6.51137900 | 0.17969000  | -0.39194000 |
| H | -5.60421200 | 1.03260800  | -1.61913600 |
| C | -7.32705000 | -0.02045100 | -2.37997500 |
| H | -7.90493300 | -0.92785900 | -2.18424700 |
| H | -8.00470300 | 0.83058900  | -2.28530800 |
| H | -6.98946000 | -0.06145000 | -3.41888800 |
| C | -5.89931600 | -1.58576000 | 2.19778400  |
| H | -5.29056300 | -1.11581000 | 2.97441000  |
| H | -6.37356800 | -0.77004500 | 1.64620800  |
| C | -6.97127900 | -2.46264900 | 2.84433600  |
| H | -7.60900500 | -1.87945900 | 3.51191800  |
| H | -7.61494200 | -2.92482500 | 2.09085400  |
| H | -6.52218000 | -3.26665200 | 3.43326800  |
| C | 5.59907800  | 1.01103600  | 1.86078300  |
| H | 5.74674200  | -0.02512500 | 2.17567500  |
| H | 4.66538100  | 1.34092200  | 2.32365700  |
| C | 6.75584900  | 1.87334000  | 2.36520600  |
| H | 6.84343000  | 1.82059600  | 3.45241600  |
| H | 7.70913900  | 1.54824800  | 1.93951800  |
| H | 6.61393200  | 2.92291700  | 2.09457100  |
| C | 5.89820500  | -2.74366500 | 0.49375400  |
| H | 5.89746200  | -2.15036000 | 1.41172800  |
| H | 5.04724300  | -3.42522000 | 0.57010600  |
| C | 7.19498500  | -3.54719900 | 0.40007400  |
| H | 8.06758400  | -2.89006200 | 0.35059500  |
| H | 7.31969300  | -4.19855600 | 1.26765300  |
| H | 7.20559600  | -4.17815100 | -0.49254300 |

### Calculated P methyl (3) DFT/B3LYP/TZVP

|   |             |             |             |
|---|-------------|-------------|-------------|
| C | 3.57685400  | 2.74512600  | 0.46806800  |
| C | 2.95773600  | 0.20536400  | -0.68683100 |
| C | 4.61344900  | 1.88144900  | 0.11702600  |
| C | 2.25415800  | 2.33115700  | 0.22355500  |
| C | 1.90201400  | 1.09006200  | -0.34358400 |
| C | 4.27710000  | 0.63478900  | -0.44434900 |
| S | 5.43697000  | -0.60021900 | -0.93882100 |
| C | 4.13855000  | -1.64729700 | -1.45807700 |
| H | 4.37537400  | -2.61423700 | -1.87294400 |
| C | 2.91228600  | -1.10642200 | -1.26949800 |
| H | 1.99966100  | -1.61699600 | -1.53225700 |
| S | 0.82653900  | 3.30397100  | 0.56291000  |
| C | -0.22829700 | 2.02614900  | -0.05503800 |
| C | 0.47876500  | 0.92726900  | -0.48753900 |
| C | 3.85065500  | 4.09909700  | 1.07327800  |
| H | 4.70558900  | 4.07445200  | 1.74887700  |
| C | 6.05623900  | 2.25942000  | 0.34002100  |
| H | 6.33672400  | 2.15817400  | 1.39324100  |
| H | 6.25115500  | 3.29231700  | 0.04848700  |
| C | -0.20338300 | -0.25955200 | -1.05243700 |
| C | -0.61626200 | -0.29761800 | -2.34606000 |
| H | -0.50139800 | 0.48164200  | -3.08288900 |
| S | -1.39664600 | -1.79102300 | -2.79118700 |
| C | -1.17386700 | -2.42152100 | -1.15706700 |
| C | -0.72588100 | -3.10378900 | 1.44002200  |
| C | -1.59848100 | -3.69157800 | -0.72031500 |
| C | -0.52432100 | -1.47834000 | -0.33936700 |
| C | -0.29124500 | -1.83417300 | 1.01222100  |
| C | -1.37798900 | -4.03691300 | 0.61160800  |
| S | -0.34280400 | -3.35295700 | 3.14503600  |
| C | 0.37571000  | -1.76254900 | 3.24202500  |
| H | 0.78984500  | -1.42812500 | 4.18000300  |
| C | 0.33447500  | -1.08928900 | 2.06915100  |
| H | 0.73192100  | -0.09372600 | 1.95004000  |
| C | -1.80887600 | -5.37595800 | 1.15555700  |
| H | -1.87113100 | -5.36256300 | 2.24369600  |
| H | -2.78886800 | -5.66844700 | 0.77685000  |
| C | -2.29046900 | -4.63599500 | -1.67133600 |
| H | -3.37676900 | -4.61472900 | -1.53660600 |
| H | -2.08764600 | -4.37602400 | -2.71052400 |
| H | 4.06321100  | 4.84608900  | 0.30148200  |
| H | 6.72896300  | 1.62572100  | -0.23736600 |
| H | 2.99487000  | 4.45946300  | 1.64545600  |
| H | -1.96423300 | -5.66616300 | -1.52456900 |
| H | -1.10220000 | -6.16513400 | 0.87928600  |
| C | -1.61647700 | 2.21479300  | -0.04480700 |

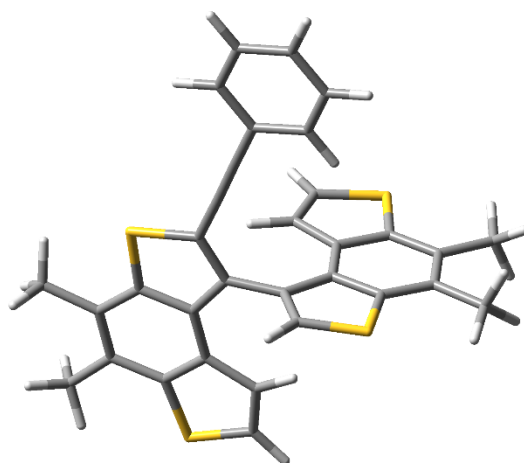

|   |             |            |             |
|---|-------------|------------|-------------|
| C | -2.81234400 | 2.40411600 | -0.02715800 |
| C | -4.21713900 | 2.60522500 | -0.01529400 |
| C | -6.99085800 | 2.99818300 | 0.00397200  |
| C | -5.08403400 | 1.60600400 | -0.49085300 |
| C | -4.76614100 | 3.80462800 | 0.46997400  |
| C | -6.14043700 | 3.99424000 | 0.47724600  |
| C | -6.45674400 | 1.80602300 | -0.47880600 |
| H | -4.66695500 | 0.68022600 | -0.86512600 |
| H | -4.10447900 | 4.57805200 | 0.83797800  |
| H | -6.55031700 | 4.92332000 | 0.85416100  |
| H | -7.11362000 | 1.02778500 | -0.84775500 |
| H | -8.06310000 | 3.14995700 | 0.01161800  |



### Calculated P propyl (trans) (3) DFT/B3LYP/TZVP

|   |             |             |             |
|---|-------------|-------------|-------------|
| C | 4.41265100  | 0.61815400  | -0.27911900 |
| C | 2.33667500  | -1.18784700 | -1.07851600 |
| C | 4.73530800  | -0.70752500 | -0.58031200 |
| C | 3.05997600  | 1.00896300  | -0.38472600 |
| C | 2.00621100  | 0.15716500  | -0.76674700 |
| C | 3.68692000  | -1.56793400 | -0.97397800 |
| S | 3.89221900  | -3.26182700 | -1.42848000 |
| C | 2.18079300  | -3.41373900 | -1.74170200 |
| H | 1.78750300  | -4.36159100 | -2.07349200 |
| C | 1.49772500  | -2.26684700 | -1.51922100 |
| H | 0.43271900  | -2.18082300 | -1.66353700 |
| S | 2.47362200  | 2.64264100  | -0.08310000 |
| C | 0.81998000  | 2.15779500  | -0.47592400 |
| C | 0.73124700  | 0.82507400  | -0.80783000 |
| C | 5.43424300  | 1.64513000  | 0.15834500  |
| C | 6.14017700  | -1.26144200 | -0.49566100 |
| H | 6.87335200  | -0.46878700 | -0.65117900 |
| C | -0.55989200 | 0.20445200  | -1.18255500 |
| C | -1.08307900 | 0.34278400  | -2.42859300 |
| H | -0.64679400 | 0.88109600  | -3.25518100 |
| S | -2.61128400 | -0.46656500 | -2.64242900 |
| C | -2.57745200 | -1.02573100 | -0.96730200 |
| C | -2.26474600 | -1.70955900 | 1.64533700  |
| C | -3.58542400 | -1.80485100 | -0.36095100 |
| C | -1.41332300 | -0.58112300 | -0.31537800 |
| C | -1.25443900 | -0.93220700 | 1.04851400  |
| C | -3.42629600 | -2.15326200 | 0.98013500  |
| S | -1.87789600 | -2.04110000 | 3.33611000  |
| C | -0.38733000 | -1.13882200 | 3.19949700  |
| H | 0.25640800  | -1.05134000 | 4.06038000  |
| C | -0.19220900 | -0.62200800 | 1.96445800  |
| H | 0.67596500  | -0.03782300 | 1.70326400  |
| C | -4.46456700 | -2.94957200 | 1.73920200  |
| H | -3.96331100 | -3.57249400 | 2.48638900  |
| C | -4.77399700 | -2.25692200 | -1.18056800 |
| H | -5.65882700 | -2.34466100 | -0.54765500 |
| H | -5.01636900 | -1.48604900 | -1.91881000 |
| H | 6.41868300  | 1.39682300  | -0.24069100 |
| H | 6.28944200  | -1.96771600 | -1.31894100 |
| H | 5.17330500  | 2.61207200  | -0.28491300 |
| H | -4.97300800 | -3.64572900 | 1.06967900  |
| C | -0.21018300 | 3.10479700  | -0.40524200 |
| C | -1.08125700 | 3.94328500  | -0.33912900 |
| C | -2.11776500 | 4.91006200  | -0.26768700 |
| C | -4.16699900 | 6.81535700  | -0.13078100 |
| C | -3.44855400 | 4.54951900  | -0.54175800 |

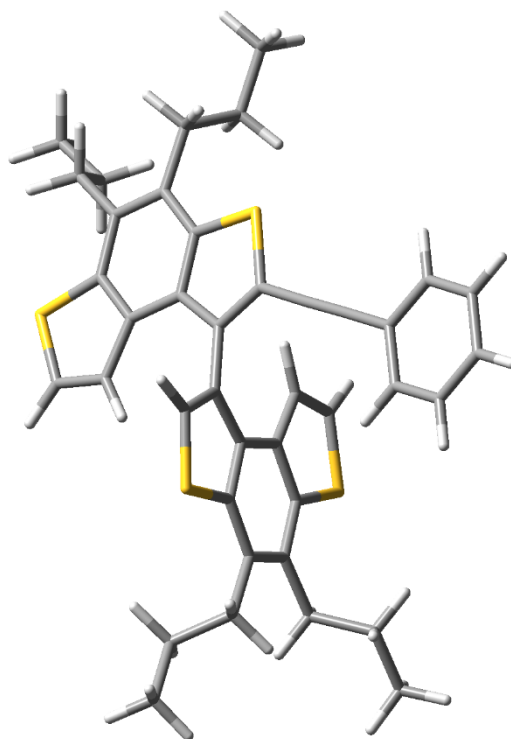

|   |             |             |             |
|---|-------------|-------------|-------------|
| C | -1.83330400 | 6.24280200  | 0.07630600  |
| C | -2.85178600 | 7.18247400  | 0.14268900  |
| C | -4.45928100 | 5.49721800  | -0.47236900 |
| H | -3.67361500 | 3.52461100  | -0.80638200 |
| H | -0.81086600 | 6.52718300  | 0.28882800  |
| H | -2.61870100 | 8.20615800  | 0.40915000  |
| H | -5.48057400 | 5.20609000  | -0.68559700 |
| H | -4.95922100 | 7.55181100  | -0.07770700 |
| C | 6.46127200  | -1.98075800 | 0.82906300  |
| H | 5.72527000  | -2.77039300 | 1.00006900  |
| H | 6.35145600  | -1.27641300 | 1.65754400  |
| C | 7.86868800  | -2.57658300 | 0.84186100  |
| H | 8.07679400  | -3.07715200 | 1.78977800  |
| H | 8.62928500  | -1.80375500 | 0.70094900  |
| H | 7.99380300  | -3.31279400 | 0.04357300  |
| C | 5.54866400  | 1.82252300  | 1.68475100  |
| H | 4.56509500  | 2.06241100  | 2.09692400  |
| H | 5.84552400  | 0.87257700  | 2.13641400  |
| C | 6.54795800  | 2.91239300  | 2.07163400  |
| H | 6.61675800  | 3.01826900  | 3.15627900  |
| H | 6.25391800  | 3.88217700  | 1.66177000  |
| H | 7.54948200  | 2.68491900  | 1.69640100  |
| C | -5.51573400 | -2.07510000 | 2.44856400  |
| H | -6.03575900 | -1.46406400 | 1.70486900  |
| H | -5.00791100 | -1.37428600 | 3.11626600  |
| C | -6.52915900 | -2.90144800 | 3.23983200  |
| H | -6.03674200 | -3.49427700 | 4.01510300  |
| H | -7.07233100 | -3.59320700 | 2.59009500  |
| H | -7.26495000 | -2.26060500 | 3.73016100  |
| C | -4.54744900 | -3.59149400 | -1.91559300 |
| H | -4.32328900 | -4.37166300 | -1.18219600 |
| H | -3.66080200 | -3.50610500 | -2.54950100 |
| C | -5.74981800 | -4.00717100 | -2.76268700 |
| H | -5.56668100 | -4.95642500 | -3.27049100 |
| H | -5.97201100 | -3.25905400 | -3.52815500 |
| H | -6.64625500 | -4.12737400 | -2.14824000 |

Calculated P (3) CONF1 (%POP = 17.3) DFT/B3LYP/TZVP

|   |             |             |             |
|---|-------------|-------------|-------------|
| C | 4.39472100  | 0.44854300  | 0.05935700  |
| C | 2.29965100  | -1.17591200 | -1.01876000 |
| C | 4.68363700  | -0.84809000 | -0.36773700 |
| C | 3.06500700  | 0.90274300  | -0.05359800 |
| C | 2.00230800  | 0.13997700  | -0.57619600 |
| C | 3.62986000  | -1.61994500 | -0.89882700 |
| S | 3.79446200  | -3.26813000 | -1.50978900 |
| C | 2.09461500  | -3.31714200 | -1.90989500 |
| H | 1.68296700  | -4.20979700 | -2.35363600 |
| C | 1.44425900  | -2.17054200 | -1.60336400 |
| H | 0.39102800  | -2.02773100 | -1.78464500 |
| S | 2.51686900  | 2.50530000  | 0.43017500  |
| C | 0.86492300  | 2.12789800  | -0.07485400 |
| C | 0.74979000  | 0.85030900  | -0.57360000 |
| C | 5.45765500  | 1.37931700  | 0.60063900  |
| C | 6.06590000  | -1.45007100 | -0.24964100 |
| H | 6.82741200  | -0.67564700 | -0.35696300 |
| C | -0.54493800 | 0.32103300  | -1.05989600 |
| C | -1.01239300 | 0.60753400  | -2.30275800 |
| H | -0.52773300 | 1.21599800  | -3.04992700 |
| S | -2.55077200 | -0.12856000 | -2.66116200 |
| C | -2.59940800 | -0.86601400 | -1.05681600 |
| C | -2.40255700 | -1.84996900 | 1.46996500  |
| C | -3.64590000 | -1.68384200 | -0.58074400 |
| C | -1.45395900 | -0.52543800 | -0.31540500 |
| C | -1.35483000 | -1.03383000 | 1.00380100  |
| C | -3.54197500 | -2.19343100 | 0.71341100  |
| S | -2.09456300 | -2.37098400 | 3.12888400  |
| C | -0.58755100 | -1.48613700 | 3.15499300  |
| H | 0.01718400  | -1.50166800 | 4.04787100  |
| C | -0.33084000 | -0.84254700 | 1.99295100  |
| H | 0.55334000  | -0.24511400 | 1.83616200  |
| C | -4.58405600 | -3.11473500 | 1.30786500  |
| H | -5.57242400 | -2.87630900 | 0.91092600  |
| C | -4.84583500 | -1.95002600 | -1.46298100 |
| H | -4.52352700 | -1.98530900 | -2.50838900 |
| H | -5.25974500 | -2.93748000 | -1.25090300 |
| H | 5.01178900  | 2.03560800  | 1.35474400  |
| H | 6.22898200  | -2.14141400 | -1.08203800 |
| H | 6.22664400  | 0.81051700  | 1.12637200  |
| H | -4.64857600 | -2.93565000 | 2.38551400  |
| C | -0.13826500 | 3.09366500  | 0.07935600  |
| C | -0.98357400 | 3.94889700  | 0.22189900  |
| C | -1.98873500 | 4.93798300  | 0.38124600  |
| C | -3.97555500 | 6.88862500  | 0.69155000  |
| C | -3.31567700 | 4.67391300  | -0.00016700 |

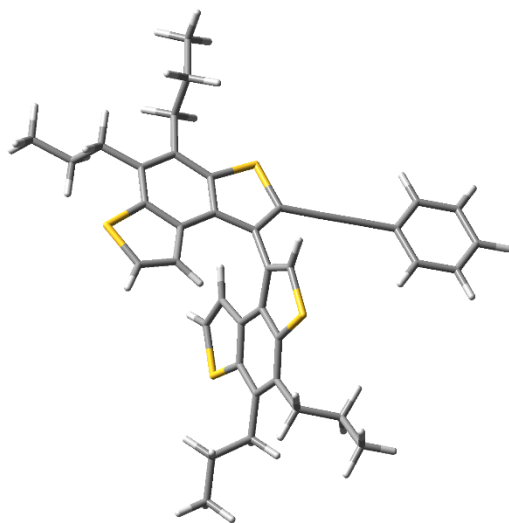

|   |             |             |             |
|---|-------------|-------------|-------------|
| C | -1.67628600 | 6.19753500  | 0.92107000  |
| C | -2.66388500 | 7.16001100  | 1.07261500  |
| C | -4.29546500 | 5.64352900  | 0.15586400  |
| H | -3.56220100 | 3.70550200  | -0.41542600 |
| H | -0.65669800 | 6.40746400  | 1.21735500  |
| H | -2.40940700 | 8.12649500  | 1.49024100  |
| H | -5.31420300 | 5.42686600  | -0.14162000 |
| H | -4.74365300 | 7.64252800  | 0.81174900  |
| C | 6.29812800  | -2.20452600 | 1.07338800  |
| H | 5.53345700  | -2.97777700 | 1.18426700  |
| H | 6.15677500  | -1.51418600 | 1.91021900  |
| C | 7.68774000  | -2.83592400 | 1.15225200  |
| H | 7.82972200  | -3.36130200 | 2.09896100  |
| H | 8.47335200  | -2.07967500 | 1.07147800  |
| H | 7.84026500  | -3.55814900 | 0.34600500  |
| C | 6.12590700  | 2.24984000  | -0.48033700 |
| H | 6.59297000  | 1.60016700  | -1.22634800 |
| H | 5.35672600  | 2.81748200  | -1.01064600 |
| C | 7.16783000  | 3.20674800  | 0.09809200  |
| H | 7.62945100  | 3.80957900  | -0.68670100 |
| H | 7.96567700  | 2.66282000  | 0.61113300  |
| H | 6.71744200  | 3.89202200  | 0.82094300  |
| C | -4.29351100 | -4.60876100 | 1.07077000  |
| H | -3.30188300 | -4.84796200 | 1.46375400  |
| H | -4.24860800 | -4.79954300 | -0.00560200 |
| C | -5.33852700 | -5.51941700 | 1.71469300  |
| H | -5.11333400 | -6.57190800 | 1.53009400  |
| H | -6.33810800 | -5.31971300 | 1.31890000  |
| H | -5.37679900 | -5.37340400 | 2.79735400  |
| C | -5.96165600 | -0.89718400 | -1.32490700 |
| H | -5.54829800 | 0.09307100  | -1.53417000 |
| H | -6.30381900 | -0.87068600 | -0.28619800 |
| C | -7.14471800 | -1.17021800 | -2.25325200 |
| H | -6.83450500 | -1.16531700 | -3.30147100 |
| H | -7.92345300 | -0.41388300 | -2.13463700 |
| H | -7.59515400 | -2.14492100 | -2.04668800 |

Calculated P (3) CONF2 (%POP = 16.6) DFT/B3LYP/TZVP

|   |             |             |             |
|---|-------------|-------------|-------------|
| C | 4.40861000  | 0.38415300  | 0.12767400  |
| C | 2.31547800  | -1.28440500 | -0.88469200 |
| C | 4.68878300  | -0.94226700 | -0.20292400 |
| C | 3.08816300  | 0.84596100  | -0.04647000 |
| C | 2.02682800  | 0.06236200  | -0.54030900 |
| C | 3.63636000  | -1.73568400 | -0.70405200 |
| S | 3.79101200  | -3.42409600 | -1.19614200 |
| C | 2.09979600  | -3.47943400 | -1.63047400 |
| H | 1.68541300  | -4.39558300 | -2.02052600 |
| C | 1.45909400  | -2.30631300 | -1.41850200 |
| H | 0.41212900  | -2.16287700 | -1.63260800 |
| S | 2.55144900  | 2.48429700  | 0.31487500  |
| C | 0.90619400  | 2.09357900  | -0.20136700 |
| C | 0.78462400  | 0.78655800  | -0.61512800 |
| C | 5.47237500  | 1.33676100  | 0.62776900  |
| C | 6.05943200  | -1.55185900 | -0.01138100 |
| H | 6.83412000  | -0.79676600 | -0.15578700 |
| C | -0.50645200 | 0.24260700  | -1.09481600 |
| C | -0.94241700 | 0.45271500  | -2.36409100 |
| H | -0.43117700 | 1.00149800  | -3.13922900 |
| S | -2.48835000 | -0.27565000 | -2.70504700 |
| C | -2.58569000 | -0.89978700 | -1.05550700 |
| C | -2.46905300 | -1.69842200 | 1.54064200  |
| C | -3.66323900 | -1.65416500 | -0.54517700 |
| C | -1.44689500 | -0.53523600 | -0.31522900 |
| C | -1.38970300 | -0.94649000 | 1.03984900  |
| C | -3.60478100 | -2.06114800 | 0.78755700  |
| S | -2.20450800 | -2.11357000 | 3.23647900  |
| C | -0.66958900 | -1.27778200 | 3.22909600  |
| H | -0.07803200 | -1.25433600 | 4.13058100  |
| C | -0.37437200 | -0.72264800 | 2.03112000  |
| H | 0.53356300  | -0.16980300 | 1.84863800  |
| C | -4.72353000 | -2.83613900 | 1.44797600  |
| H | -4.29918000 | -3.50859100 | 2.19983200  |
| C | -4.81577900 | -2.01939100 | -1.45467500 |
| H | -5.74218800 | -2.09068300 | -0.88206700 |
| H | -4.97694300 | -1.21054200 | -2.17424900 |
| H | 5.01926700  | 2.04991300  | 1.32365000  |
| H | 6.23070000  | -2.30246400 | -0.78897300 |
| H | 6.22120900  | 0.79639800  | 1.20961500  |
| H | -5.21793600 | -3.48304800 | 0.72099800  |
| C | -0.08773100 | 3.07883400  | -0.13652000 |
| C | -0.92708100 | 3.94926800  | -0.07267200 |
| C | -1.92605000 | 4.95503400  | -0.00528500 |
| C | -3.90097100 | 6.93779200  | 0.12377300  |
| C | -3.24503900 | 4.67728600  | -0.40430800 |

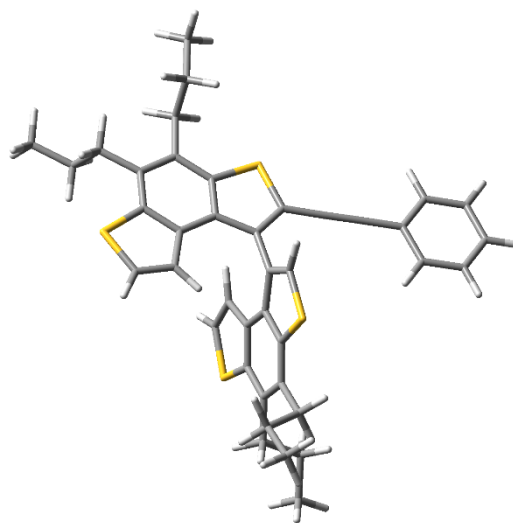

|   |             |             |             |
|---|-------------|-------------|-------------|
| C | -1.61546300 | 6.24458600  | 0.45955400  |
| C | -2.59716800 | 7.22290100  | 0.52146000  |
| C | -4.21894400 | 5.66300000  | -0.33815600 |
| H | -3.49011500 | 3.68591400  | -0.76235300 |
| H | -0.60199500 | 6.46510700  | 0.76884400  |
| H | -2.34427800 | 8.21253000  | 0.88193100  |
| H | -5.23154900 | 5.43564400  | -0.64830900 |
| H | -4.66448800 | 7.70416400  | 0.17386800  |
| C | 6.25195600  | -2.21355800 | 1.36653600  |
| H | 5.47420500  | -2.96737500 | 1.51414600  |
| H | 6.10195700  | -1.46394300 | 2.14909600  |
| C | 7.63044600  | -2.85512100 | 1.52157800  |
| H | 7.74413400  | -3.31388600 | 2.50597100  |
| H | 8.42823800  | -2.11639900 | 1.40573600  |
| H | 7.79046000  | -3.63447600 | 0.77198700  |
| C | 6.17695100  | 2.12076100  | -0.49554300 |
| H | 6.65118800  | 1.41441300  | -1.18321300 |
| H | 5.42788900  | 2.65935700  | -1.08197000 |
| C | 7.21927300  | 3.10278200  | 0.03835700  |
| H | 7.70694200  | 3.64271800  | -0.77590800 |
| H | 7.99755900  | 2.58640300  | 0.60690200  |
| H | 6.76268300  | 3.84312000  | 0.70044700  |
| C | -5.77842700 | -1.94019100 | 2.12425900  |
| H | -6.22219300 | -1.27888600 | 1.37418900  |
| H | -5.28379100 | -1.28860700 | 2.84925500  |
| C | -6.87601500 | -2.74649400 | 2.81785400  |
| H | -6.46098600 | -3.38940400 | 3.59847300  |
| H | -7.40662600 | -3.38809300 | 2.10896600  |
| H | -7.61254900 | -2.09020600 | 3.28613800  |
| C | -4.60067800 | -3.33385700 | -2.22832000 |
| H | -4.45715400 | -4.15070800 | -1.51493300 |
| H | -3.67273200 | -3.26470600 | -2.80225900 |
| C | -5.76359900 | -3.66195400 | -3.16426600 |
| H | -5.58959100 | -4.59856000 | -3.69809500 |
| H | -5.90440400 | -2.87595200 | -3.91083500 |
| H | -6.70155700 | -3.76453700 | -2.61172800 |

Calculated P (3) CONF3 (%POP = 12.6) DFT/B3LYP/TZVP

|   |             |             |             |
|---|-------------|-------------|-------------|
| C | 4.40634900  | 0.46105900  | 0.15077900  |
| C | 2.35081400  | -1.33559100 | -0.70765300 |
| C | 4.71429800  | -0.88409600 | -0.05620000 |
| C | 3.07998400  | 0.88026000  | -0.07805700 |
| C | 2.03582000  | 0.03278300  | -0.49748900 |
| C | 3.67782900  | -1.74319500 | -0.47565000 |
| S | 3.86257500  | -3.47115700 | -0.78679600 |
| C | 2.17340200  | -3.60141500 | -1.21297500 |
| H | 1.77474900  | -4.56143400 | -1.50041800 |
| C | 1.51250900  | -2.42345400 | -1.12760700 |
| H | 0.46255100  | -2.32264500 | -1.35116200 |
| S | 2.51465200  | 2.53808400  | 0.10801800  |
| C | 0.88280600  | 2.07113100  | -0.38683400 |
| C | 0.78551100  | 0.72682600  | -0.66564700 |
| C | 5.43176100  | 1.46154500  | 0.63712000  |
| C | 6.11352700  | -1.43038100 | 0.11951300  |
| H | 6.05335500  | -2.46505300 | 0.47061400  |
| C | -0.48928800 | 0.11873700  | -1.11085800 |
| C | -0.90306700 | 0.19420800  | -2.40253400 |
| H | -0.38305600 | 0.66870000  | -3.21973100 |
| S | -2.43427700 | -0.58403700 | -2.69598400 |
| C | -2.55684600 | -1.03948400 | -0.99383100 |
| C | -2.48113400 | -1.57201100 | 1.67117900  |
| C | -3.63630600 | -1.75135800 | -0.42929100 |
| C | -1.43611800 | -0.58850600 | -0.27384100 |
| C | -1.40029600 | -0.86118400 | 1.11648800  |
| C | -3.59887300 | -2.02188200 | 0.93841700  |
| S | -2.24373700 | -1.81260300 | 3.40437000  |
| C | -0.71727000 | -0.96388200 | 3.34001200  |
| H | -0.14251500 | -0.84400900 | 4.24469400  |
| C | -0.40557000 | -0.52781400 | 2.09776900  |
| H | 0.50022500  | 0.01412100  | 1.87620000  |
| C | -4.72141100 | -2.74103100 | 1.65329300  |
| H | -4.30351800 | -3.33166100 | 2.47433500  |
| C | -4.76856800 | -2.21823900 | -1.31749700 |
| H | -5.70440500 | -2.24262200 | -0.75641100 |
| H | -4.92433500 | -1.48666700 | -2.11658600 |
| H | 6.42411900  | 1.19569100  | 0.26881600  |
| H | 6.63830500  | -0.88336300 | 0.90476100  |
| H | 5.21153600  | 2.44235200  | 0.20396000  |
| H | -5.19647700 | -3.46167800 | 0.98520200  |
| C | -0.12566300 | 3.04237600  | -0.43725300 |
| C | -0.97858300 | 3.90110300  | -0.47395100 |
| C | -1.99367800 | 4.89170100  | -0.52256400 |
| C | -4.00081700 | 6.84363400  | -0.62137400 |
| C | -1.70228200 | 6.23305900  | -0.22036200 |

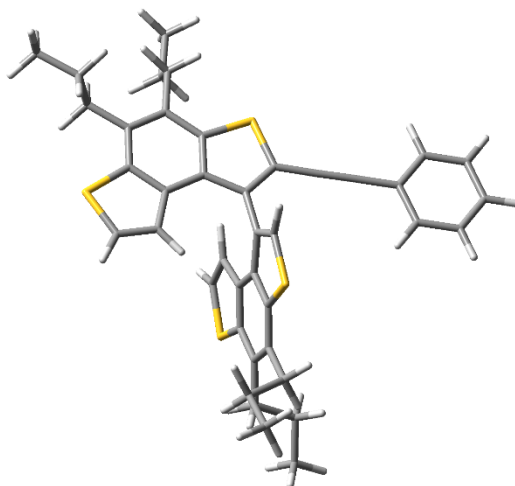

|   |             |             |             |
|---|-------------|-------------|-------------|
| C | -3.30990400 | 4.54642100  | -0.87532200 |
| C | -4.29980300 | 5.51717400  | -0.92254900 |
| C | -2.69990600 | 7.19581700  | -0.27075300 |
| H | -0.69099800 | 6.50582700  | 0.05223800  |
| H | -3.54024000 | 3.51504300  | -1.10831200 |
| H | -5.31006800 | 5.23759200  | -1.19540900 |
| H | -2.46170000 | 8.22589800  | -0.03527500 |
| H | -4.77678400 | 7.59810600  | -0.65932600 |
| C | 6.95674400  | -1.39332000 | -1.16937500 |
| H | 7.03778000  | -0.35902700 | -1.51637300 |
| H | 6.43098900  | -1.93827800 | -1.95771800 |
| C | 8.35238600  | -1.98481600 | -0.97400100 |
| H | 8.93146300  | -1.94451000 | -1.89890900 |
| H | 8.29837800  | -3.03100700 | -0.66178800 |
| H | 8.91164900  | -1.43997300 | -0.20850800 |
| C | 5.48411700  | 1.59804000  | 2.17056400  |
| H | 4.49033900  | 1.86221700  | 2.54185300  |
| H | 5.72433700  | 0.62520200  | 2.60954000  |
| C | 6.50187700  | 2.64035800  | 2.63281100  |
| H | 6.52311400  | 2.71617500  | 3.72193900  |
| H | 6.26214500  | 3.63031900  | 2.23607300  |
| H | 7.51127800  | 2.38587000  | 2.29827600  |
| C | -5.79717900 | -1.79591600 | 2.22105700  |
| H | -6.23487700 | -1.21675700 | 1.40259800  |
| H | -5.32219800 | -1.07046900 | 2.88661700  |
| C | -6.89809700 | -2.54387900 | 2.97237400  |
| H | -6.48994200 | -3.10204100 | 3.81901000  |
| H | -7.40924300 | -3.25835500 | 2.32124800  |
| H | -7.64971900 | -1.85404400 | 3.36182300  |
| C | -4.52764400 | -3.60052900 | -1.95304700 |
| H | -4.39014200 | -4.34128100 | -1.15985400 |
| H | -3.59002100 | -3.57878900 | -2.51488900 |
| C | -5.67034200 | -4.03179000 | -2.87191500 |
| H | -6.61732000 | -4.08917300 | -2.32829000 |
| H | -5.47837100 | -5.01467800 | -3.30729700 |
| H | -5.80434300 | -3.32494500 | -3.69495300 |



Calculated P (3) CONF4 (%POP = 8.0) DFT/B3LYP/TZVP

|   |             |             |             |
|---|-------------|-------------|-------------|
| C | 4.38305300  | 0.73818100  | -0.33235300 |
| C | 2.32321900  | -1.05012800 | -1.20975000 |
| C | 4.72372700  | -0.55590800 | -0.73425800 |
| C | 3.02090700  | 1.10693100  | -0.37864500 |
| C | 1.97467400  | 0.26243400  | -0.79592300 |
| C | 3.68276200  | -1.40816600 | -1.16370400 |
| S | 3.90968900  | -3.06106100 | -1.74198500 |
| C | 2.19441600  | -3.22648500 | -2.02577900 |
| H | 1.81154700  | -4.15648500 | -2.41526100 |
| C | 1.49486200  | -2.11282000 | -1.70672200 |
| H | 0.42515500  | -2.03979700 | -1.82006700 |
| S | 2.41101000  | 2.70278500  | 0.05120800  |
| C | 0.75779600  | 2.21264700  | -0.33708600 |
| C | 0.68654600  | 0.90511300  | -0.76062600 |
| C | 5.39500400  | 1.75313400  | 0.15297500  |
| C | 6.14068700  | -1.08478300 | -0.72159500 |
| H | 6.85437400  | -0.26798900 | -0.83781900 |
| C | -0.60064800 | 0.28503600  | -1.14955500 |
| C | -1.15334300 | 0.49513300  | -2.37261700 |
| H | -0.74714100 | 1.09872300  | -3.16888700 |
| S | -2.66456000 | -0.33839900 | -2.61288300 |
| C | -2.58055700 | -1.01188700 | -0.98217300 |
| C | -2.18677700 | -1.87989100 | 1.56397700  |
| C | -3.55049100 | -1.86565400 | -0.41562700 |
| C | -1.41642100 | -0.57941700 | -0.32220100 |
| C | -1.21506600 | -1.02721900 | 1.00728500  |
| C | -3.34542100 | -2.31568900 | 0.88850300  |
| S | -1.75748000 | -2.31451500 | 3.22080600  |
| C | -0.30452200 | -1.34780500 | 3.12607000  |
| H | 0.34895300  | -1.29352200 | 3.98233700  |
| C | -0.15023600 | -0.73940900 | 1.92751400  |
| H | 0.68821600  | -0.10144700 | 1.69675900  |
| C | -4.29850800 | -3.26753000 | 1.57681200  |
| H | -5.31949800 | -3.09981200 | 1.22934700  |
| C | -4.78095300 | -2.23255000 | -1.21583700 |
| H | -4.51591400 | -2.29424500 | -2.27599300 |
| H | -5.12648800 | -3.23098200 | -0.94192200 |
| H | 6.37403400  | 1.55412700  | -0.28505000 |
| H | 6.28322200  | -1.72835800 | -1.59587900 |
| H | 5.10476200  | 2.74306200  | -0.21490900 |
| H | -4.31271300 | -3.04845600 | 2.64889000  |
| C | -0.28748800 | 3.13133000  | -0.17442300 |
| C | -1.16990100 | 3.94717900  | -0.02619600 |
| C | -2.21871600 | 4.88832100  | 0.14218900  |
| C | -4.29203600 | 6.74341000  | 0.47174500  |
| C | -1.94472700 | 6.19835900  | 0.57140600  |

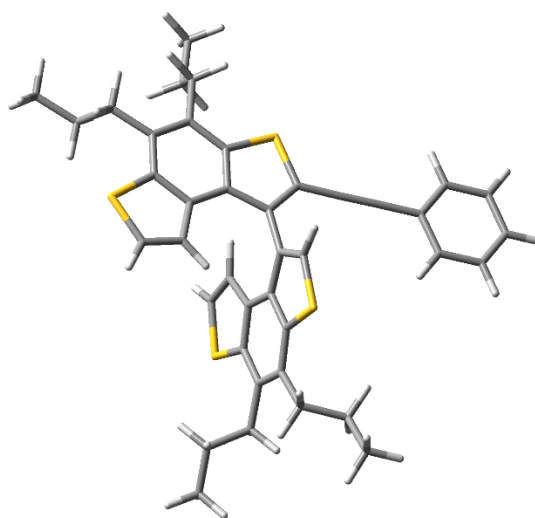

|   |             |             |             |
|---|-------------|-------------|-------------|
| C | -3.55131700 | 4.52500500  | -0.11890800 |
| C | -4.57401300 | 5.44769700  | 0.04610400  |
| C | -2.97510300 | 7.11316500  | 0.73307100  |
| H | -0.92095500 | 6.48480100  | 0.77449600  |
| H | -3.76826900 | 3.51741300  | -0.44864100 |
| H | -5.59660000 | 5.15457500  | -0.15798000 |
| H | -2.74997600 | 8.11945200  | 1.06466600  |
| H | -5.09355500 | 7.46037800  | 0.59944100  |
| C | 6.50803400  | -1.88816700 | 0.54133000  |
| H | 5.79198400  | -2.70326200 | 0.67304200  |
| H | 6.40463900  | -1.24599300 | 1.41965600  |
| C | 7.92669700  | -2.45348400 | 0.47974700  |
| H | 8.16758500  | -3.01476100 | 1.38493200  |
| H | 8.66842300  | -1.65676400 | 0.37631800  |
| H | 8.04663000  | -3.12910700 | -0.37117700 |
| C | 5.54316000  | 1.82569500  | 1.68505900  |
| H | 4.56550700  | 2.01551200  | 2.13561200  |
| H | 5.86922500  | 0.85296000  | 2.06185200  |
| C | 6.53034000  | 2.90659000  | 2.12464200  |
| H | 6.62345800  | 2.93786900  | 3.21218200  |
| H | 6.20773100  | 3.89624900  | 1.79083400  |
| H | 7.52663800  | 2.72693500  | 1.71148500  |
| C | -3.93721500 | -4.75188500 | 1.37952700  |
| H | -2.91308300 | -4.92029300 | 1.72270300  |
| H | -3.94202100 | -4.98367500 | 0.31031600  |
| C | -4.89090000 | -5.69134100 | 2.11700900  |
| H | -5.92081300 | -5.56308800 | 1.77276000  |
| H | -4.87681400 | -5.50352600 | 3.19378300  |
| H | -4.61670600 | -6.73656100 | 1.95940500  |
| C | -5.94446200 | -1.23618200 | -1.05425600 |
| H | -5.59984000 | -0.23505800 | -1.32671700 |
| H | -6.22818900 | -1.18352000 | 0.00091500  |
| C | -7.16104600 | -1.61186900 | -1.89972900 |
| H | -7.97278300 | -0.89374600 | -1.76593400 |
| H | -7.54402900 | -2.59936500 | -1.62812800 |
| H | -6.91134600 | -1.63574600 | -2.96371900 |

### Calculated P methyl (3) DFT/CAM-B3LYP/TZVP (Ground state)

|   |             |             |             |
|---|-------------|-------------|-------------|
| C | 3.50977400  | 2.78657100  | 0.45195700  |
| C | 2.91063500  | 0.26092400  | -0.70822300 |
| C | 4.54366200  | 1.94109700  | 0.09209100  |
| C | 2.19090600  | 2.36292200  | 0.21405200  |
| C | 1.85424400  | 1.13099300  | -0.35448800 |
| C | 4.21836600  | 0.69588400  | -0.47397100 |
| S | 5.38012100  | -0.51598900 | -0.97781600 |
| C | 4.09779100  | -1.56890000 | -1.49330400 |
| H | 4.34019900  | -2.53104300 | -1.91497300 |
| C | 2.87252500  | -1.04773300 | -1.29818300 |
| H | 1.96386800  | -1.56563300 | -1.55866200 |
| S | 0.76287400  | 3.31047100  | 0.56786600  |
| C | -0.27170400 | 2.03536600  | -0.04670200 |
| C | 0.43186900  | 0.95469500  | -0.48955300 |
| C | 3.77452000  | 4.13381300  | 1.06484600  |
| H | 4.61326100  | 4.10126600  | 1.75854400  |
| C | 5.98031600  | 2.32749800  | 0.30790800  |
| H | 6.27802200  | 2.17792000  | 1.34903700  |
| H | 6.15457900  | 3.37469600  | 0.06417900  |
| C | -0.23454100 | -0.23852700 | -1.04871600 |
| C | -0.68324800 | -0.28213200 | -2.32075900 |
| H | -0.61289600 | 0.50599800  | -3.05327000 |
| S | -1.42806000 | -1.78862100 | -2.74742900 |
| C | -1.13794800 | -2.41727900 | -1.13605100 |
| C | -0.58800000 | -3.09791800 | 1.43195400  |
| C | -1.50816500 | -3.69996900 | -0.69381200 |
| C | -0.49653300 | -1.46902600 | -0.33610300 |
| C | -0.20973100 | -1.82337200 | 1.00002700  |
| C | -1.23639700 | -4.04320600 | 0.61785700  |
| S | -0.14630300 | -3.34529500 | 3.11030500  |
| C | 0.52409600  | -1.74412300 | 3.19772800  |
| H | 0.95817600  | -1.40203500 | 4.12336400  |
| C | 0.42701800  | -1.06508700 | 2.04030900  |
| H | 0.79037000  | -0.05770600 | 1.91618500  |
| C | -1.60756900 | -5.39312900 | 1.16594800  |
| H | -1.64608100 | -5.38418300 | 2.25415000  |
| H | -2.58399500 | -5.71672200 | 0.80776400  |
| C | -2.19769300 | -4.65647100 | -1.62694100 |
| H | -3.27833000 | -4.66296800 | -1.46166400 |
| H | -2.02975800 | -4.38840300 | -2.66913700 |
| H | 4.00830100  | 4.87887300  | 0.29975400  |
| H | 6.65028200  | 1.73266100  | -0.31084500 |
| H | 2.90934200  | 4.49698300  | 1.61825200  |
| H | -1.83985300 | -5.67626400 | -1.49168100 |
| H | -0.88018200 | -6.15404200 | 0.87107400  |
| C | -1.66975800 | 2.20059500  | -0.02590600 |

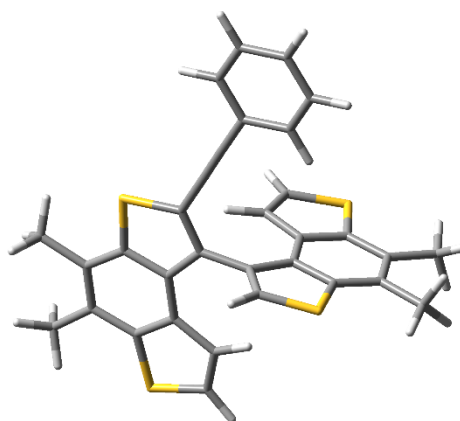

|   |             |            |             |
|---|-------------|------------|-------------|
| C | -2.86152600 | 2.35595300 | -0.00417500 |
| C | -4.27638800 | 2.51779300 | 0.01116500  |
| C | -7.04456300 | 2.82735700 | 0.03564700  |
| C | -5.10601600 | 1.50195400 | -0.46926000 |
| C | -4.85283600 | 3.69046400 | 0.50389500  |
| C | -6.22733200 | 3.84020600 | 0.51424100  |
| C | -6.47949000 | 1.65994900 | -0.45509900 |
| H | -4.66108700 | 0.59273000 | -0.85070600 |
| H | -4.21287700 | 4.47875200 | 0.87698800  |
| H | -6.66369900 | 4.75312800 | 0.89856000  |
| H | -7.11333200 | 0.86641100 | -0.82937500 |
| H | -8.12012600 | 2.94754100 | 0.04538600  |

### Calculated P methyl (3) DFT/CAM-B3LYP/TZVP (Excited state)

|   |             |             |             |
|---|-------------|-------------|-------------|
| C | 4.28175500  | 2.00392400  | 0.39046500  |
| C | 3.33473800  | -0.57937900 | -0.35080900 |
| C | 5.19623900  | 0.93764300  | 0.24632300  |
| C | 2.94498300  | 1.77042500  | 0.14281600  |
| C | 2.40591900  | 0.50977200  | -0.25982100 |
| C | 4.69105600  | -0.31294000 | -0.10556900 |
| S | 5.64673600  | -1.77871700 | -0.25529700 |
| C | 4.23015700  | -2.70165700 | -0.62216900 |
| H | 4.31510600  | -3.76058500 | -0.80528600 |
| C | 3.10089800  | -1.95236600 | -0.63869100 |
| H | 2.12872600  | -2.36689800 | -0.84943900 |
| S | 1.67701300  | 2.99672500  | 0.27846000  |
| C | 0.44965500  | 1.82457400  | -0.20204200 |
| C | 1.02546700  | 0.53096600  | -0.44980200 |
| C | 4.77119000  | 3.36535700  | 0.79592000  |
| H | 5.47338400  | 3.30500200  | 1.62751000  |
| C | 6.65736500  | 1.14748200  | 0.49991400  |
| H | 6.86542000  | 1.25109900  | 1.56942200  |
| H | 7.02058500  | 2.05480100  | 0.01502000  |
| C | 0.18612700  | -0.55941500 | -0.95542000 |
| C | 0.28037600  | -0.99495800 | -2.23484100 |
| H | 0.96365100  | -0.63007200 | -2.98508700 |
| S | -0.85839600 | -2.23292700 | -2.64159100 |
| C | -1.52351400 | -2.19038400 | -1.01823100 |
| C | -2.31337400 | -1.93183600 | 1.56305900  |
| C | -2.57581500 | -3.00281700 | -0.56079600 |
| C | -0.86422000 | -1.24374000 | -0.23029200 |
| C | -1.25888200 | -1.12781800 | 1.12007600  |
| C | -2.99017500 | -2.85782600 | 0.75128300  |
| S | -2.64959800 | -1.64494400 | 3.25926600  |
| C | -1.37628100 | -0.46404500 | 3.33794500  |
| H | -1.17878500 | 0.03959100  | 4.27047700  |

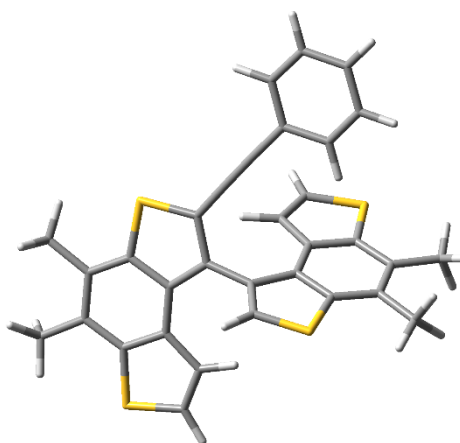

|   |             |             |             |
|---|-------------|-------------|-------------|
| C | -0.73894300 | -0.29251900 | 2.16551200  |
| H | 0.07357200  | 0.40306200  | 2.03120300  |
| C | -4.11286300 | -3.68281100 | 1.31535000  |
| H | -4.56880500 | -3.19549100 | 2.17621600  |
| H | -4.89854900 | -3.84942900 | 0.58014300  |
| C | -3.23305900 | -3.99301600 | -1.48259000 |
| H | -4.19639300 | -3.62249000 | -1.84239900 |
| H | -2.61676400 | -4.19679300 | -2.35683400 |
| H | 5.28595800  | 3.86245900  | -0.03016000 |
| H | 7.25445800  | 0.31536000  | 0.13107700  |
| H | 3.95184700  | 4.01152000  | 1.10599100  |
| H | -3.41432200 | -4.94450400 | -0.98377600 |
| H | -3.75697400 | -4.66262100 | 1.64511100  |
| C | -0.85309600 | 2.17628800  | -0.34093300 |
| C | -2.04116200 | 2.47143300  | -0.45673900 |
| C | -3.39152100 | 2.76236900  | -0.59005400 |
| C | -6.12220700 | 3.32901300  | -0.86432300 |
| C | -4.30992500 | 1.74997900  | -0.95928100 |
| C | -3.88849500 | 4.06747500  | -0.36184100 |
| C | -5.23116000 | 4.33484100  | -0.49880200 |
| C | -5.64871200 | 2.04006100  | -1.09179500 |
| H | -3.94101500 | 0.74744400  | -1.13129900 |
| H | -3.19716600 | 4.84999500  | -0.07894500 |
| H | -5.59590000 | 5.33861800  | -0.32052100 |
| H | -6.33868100 | 1.25492600  | -1.37460000 |
| H | -7.17655100 | 3.54835000  | -0.97016600 |
